# 1 **Predicting genetic biodiversity in salamanders using** 2 **geographic, climatic, and life history traits**

3  
4 **Danielle J. Parsons <sup>1</sup>, Abigail E. Green <sup>2</sup>, Bryan C. Carstens <sup>1</sup> and Tara A. Pelletier <sup>2</sup>**  
5

## 6 **Affiliations**

7 <sup>1</sup> Museum of Biological Diversity and Department of Evolution, Ecology, and Organismal  
8 Biology; The Ohio State University; Columbus, OH USA 43210

9 <sup>2</sup> Department of Biology, Radford University, Radford, VA USA 24142  
10

## 11 **Abstract**

12       The geographic distribution of genetic variation within a species reveals information  
13 about its evolutionary history, including responses to historical climate change and dispersal  
14 ability across various habitat types. We combine genetic data from salamander species with  
15 geographic, climatic, and life history data collected from open-source online repositories to  
16 develop a machine learning model designed to identify the traits that are most predictive of  
17 unrecognized genetic lineages. We find evidence of hidden diversity distributed throughout the  
18 clade Caudata that is largely the result of variation in climatic variables. We highlight some of  
19 the difficulties in using machine-learning models on open-source data that are often messy and  
20 potentially taxonomically and geographically biased.  
21

## 22 Introduction

23 Documenting biodiversity is an important first step in understanding both ecological and  
24 evolutionary processes (Gadelha *et al.*, 2021), particularly the functional roles that act to connect  
25 processes functioning at both shallow and deep time scales (Guralnick & Hill, 2009). Notably,  
26 any such documentation of biodiversity implicitly assumes that the units (e.g., species) are  
27 comparable across different geographic regions. Given that a Linnean shortfall (i.e., the ratio of  
28 recognized to unrecognized species (Whittaker *et al.*, 2005)) exists in most clades and may be  
29 substantial across Eukaryota (Mora *et al.*, 2011), it is not clear that this assumption is reasonable.  
30 An alternative approach is to utilize evolutionary significant units (Moritz, 1994), or genetic  
31 lineages, in place of species in broad analyses of biodiversity (e.g., (Mable, 2019)). This may be  
32 particularly useful in clades with relatively high degrees of morphological and ecological  
33 conservatism. One such clade is Caudata (i.e., salamanders and newts), which exhibits high  
34 frequencies of cryptic species (e.g., (Jockusch *et al.*, 2012; Camp & Wooten, 2016; Bernardes *et*  
35 *al.*, 2020)).

36 Identifying genetic lineages in Caudata can have important conservation implications.  
37 For example, Mead *et al.* (2005) discovered a new species of western *Plethodon* salamander that  
38 was originally thought to be either *P. elongatus* or *P. stormi* (Mead *et al.*, 2005). All three of  
39 these species are listed on the IUCN Red List as either near threatened (*P. elongatus*), vulnerable  
40 (*P. asupak*), or endangered (*P. stormi*). More recently, Parra Olea *et al.* (2020) discovered five  
41 cryptic lineages in *Chiropetrotriton* from Mexico, several of which are threatened due to their  
42 restricted ranges (Parra Olea *et al.*, 2020). Species with small ranges and/or limited dispersal  
43 capabilities can be harder to protect because their distributions often do not fall within protected  
44 areas (Nauman & Olson, 2008) and small ranges are often used as a factor in assigning

45 conservation priorities (Hortal *et al.*, 2015). Therefore, it is important to identify these lineages,  
46 as they could easily go unnoticed and unprotected. Many other species of salamander that would  
47 have otherwise gone unnoticed and have been recognized using molecular data have small  
48 ranges and likely need protection (Steffen *et al.*, 2014; Nishikawa & Matsui, 2014; Min *et al.*,  
49 2016; Kuchta *et al.*, 2018; Okamiya *et al.*, 2018). The presence of cryptic diversity has been  
50 recently highlighted as a key component of undescribed biodiversity that requires greater  
51 attention (Bickford *et al.*, 2007; Pfenninger & Schwenk, 2007).

52         Efforts to conserve undescribed genetic diversity can be facilitated using computational  
53 methods that identify genetic lineages representing potentially hidden diversity in need of further  
54 investigation. The use of data science techniques has allowed biodiversity studies to expand their  
55 geographic and taxonomic focus to explore broader patterns of evolution, which can be difficult  
56 to assess using traditional meta-analysis methods (Lyman & Edwards, 2022). Macrogenetics, a  
57 relatively new field that merges biodiversity data with genetic data (Blanchet *et al.*, 2017; Leigh  
58 *et al.*, 2021), has been used to explore how human impacts influence levels of intraspecific  
59 genetic diversity (Miraldo *et al.*, 2016; Millette *et al.*, 2020), to study past and future climate  
60 refugia (Carstens *et al.*, 2018; Baranzelli *et al.*, 2022), and to quantify latitudinal biodiversity  
61 gradients (Gratton *et al.*, 2017; Pelletier & Carstens, 2018; Barrow *et al.*, 2021; Fonseca *et al.*  
62 2023). Macrogenetic methods, particularly in combination with predictive modeling, can be used  
63 to inform conservation policies by identifying species, taxonomic groups, or geographic areas in  
64 need of further investigation (Pelletier *et al.*, 2018; Raposo *et al.*, 2021). Recently, such analyses  
65 have expanded to taxonomic work.

66         Parsons *et al.* (2022) analyzed mitochondrial DNA sequences from over 4000 species of  
67 mammals, representing roughly 66% of currently described species, and found that mammal

68 diversity is largely under-described using molecular species delimitation methods on publicly  
69 available barcode data. This is useful for several reasons. A comprehensive list of genetic  
70 lineages that may represent species now exists that can help focus taxonomic efforts. Parsons *et*  
71 *al.* (2022) also found that taxa with small bodies, and large geographic distributions with  
72 variation in precipitation and isothermality, were more likely to contain cryptic diversity. While  
73 some of this might seem obvious (morphological differences are harder to observe in small-  
74 bodied animals and these animals may be harder to find), it does allow researchers to document  
75 characteristics of species, higher taxonomic groups, or even geographic regions that contribute to  
76 diversification and therefore biodiversity patterns. When done in disparate taxonomic groups  
77 (e.g., vertebrates, invertebrates, plants, and fungi) and at different levels (e.g., Class, Order,  
78 Family) this furthers our understanding of core evolutionary processes.

79         A similar approach was taken in birds. Using a tree-based molecular species delimitation  
80 method, Smith *et al.* (2018) found that latitude explained variation in phylogeographic breaks,  
81 while other traits pertaining to habitat and life history explained very little. In this case,  
82 phylogeographic structure was higher in the tropics. Conversely, in other organisms, isolation-  
83 by-distance within species is often higher at higher latitudes (multiple taxonomic groups:  
84 Pelletier & Carstens, 2018; amphibians: Amador *et al.*, 2023). Further, genetic variation within  
85 amphibians was best explained by range size and elevation, rather than latitude, in the neotropics  
86 (Amador *et al.*, 2023), while latitude was an important predictor of genetic diversity in the  
87 nearctic (Barrow *et al.*, 2021). This suggests that differences exist in how genetic variation is  
88 distributed within species depending on which taxonomic groups are being examined, and at  
89 what spatial scale.

90           In order to expand these approaches, we conducted a computational assessment of  
91 genetic lineages in roughly 100 salamander species using the *phylogatR* database (Pelletier *et al.*,  
92 2022). *PhylogatR* aggregates DNA sequence data from both GenBank and BOLD into sequence  
93 alignments, providing associated GBIF occurrence records (i.e., GPS coordinates) for each  
94 sequence. There are over 700 described species of salamanders belonging to nine families  
95 (Bánki, O. *et al.*, 2022), most located in the northern hemisphere. While salamanders contain a  
96 wide variety of life history strategies and habitats, they are likely to have high levels of cryptic  
97 diversity due to their moisture requirements and similar body forms. However, their eco-  
98 evolutionary processes can vary from species to species and sometimes oppose our expectations  
99 (Pelletier *et al.*, 2011, 2015; Pelletier & Carstens, 2016; Jones and Weisrock 2018; Pyron *et al.*,  
100 2020; Dufresnes *et al.*, 2021). We follow methods from Parsons *et al.* (2022) and use molecular  
101 species delimitation methods to estimate the number of genetic lineages present in previously  
102 collected data that is both openly available and easily tractable. We then use a predictive  
103 modeling approach to determine whether any variables pertaining to geography, the  
104 environment, or life history traits contribute to the presence of genetic lineages within species.  
105 We also discuss some of the difficulties in using open-source data that are often messy and  
106 potentially taxonomically and geographically biased.

107

## 108 **Materials and Methods**

### 109 **Collection of genetic and geographic data**

110           We downloaded all available data from the *phylogatR* database (<https://phylogatr.org/>)  
111 using the search term ‘Caudata’ on 2/4/22. The uncleaned data represented four families, 93  
112 different species, and 14 loci with a total of 3768 DNA sequences. To begin cleaning the data, we

113 calculated nucleotide diversity ( $\pi$ ) values for each locus in every species and found outliers by  
114 setting lower and upper bounds of 2.5% (0) and 97.5% (0.2193634) respectively. For each of the  
115 four outliers and two species with missing  $\pi$  values, we opened the DNA sequence file in  
116 Mesquite v3.7 (Maddison & Maddison, 2021) and removed any extremely short or non-  
117 overlapping sequences (Data S1). Additionally, we discovered a typo for the species  
118 *Batrachuperus karlschmidti* causing there to be two different species folders for the same  
119 species. Both the sequence and occurrence files were merged for the species and the sequence  
120 files were realigned to correct the error. Two species complexes were present in the dataset, and  
121 these were kept named as downloaded: *Triturus cristatus x dobrogicus macrosomus* and  
122 *Ambystoma laterale jeffersonianum* complex.

123 Species alignments from the download for both the mitochondrial genes Cytochrome  
124 oxidase I (*COI*) and Cytochrome b (*cytb*) were merged for all salamander species and aligned  
125 using MAFFT v7.5 (Katoh & Standley, 2013) with the default settings and including the –  
126 adjustdirection command to account for reverse complement sequences. We visually inspected  
127 alignment files for both genes and removed all short sequences, which we classified as those  
128 missing 50% or more of the second half of the sequence. Twenty-one sequences were removed  
129 from the *COI* alignment and 99 were removed from the *cytb* alignment, leaving totals of 768 and  
130 908 sequences for *COI* and *cytb*, respectively. The sequences for seven species were completely  
131 removed from further analysis due to their short length (missing 50% or more of the second half  
132 of the sequences). In total, eighty-three species remained with an average of approximately 20  
133 sequences per nominal species (see Data S2 for a list of identifiers corresponding to the  
134 sequences used in this study).

135

## 136 **Species delimitation**

137           We used three methods of species delimitation to determine the number of genetic  
138 lineages present in our samples. The GMYC is a tree-based method that takes a phylogenetic tree  
139 as input and finds a point in the tree where branching changes from within to between species  
140 (Pons *et al.*, 2006). The ABGD (Puillandre *et al.*, 2012) and ASAP (Puillandre *et al.*, 2021)  
141 methods are distance-based delimitation methods that use pairwise genetic distances to establish  
142 the threshold between intra- and inter-species divergence. Because each method is based on a  
143 specific set of assumptions, it is best to use multiple methods and compare their results in order  
144 to achieve a more accurate delimitation (Carstens *et al.*, 2013). By looking for concordance  
145 across methods, we can increase our confidence in the identified lineage boundaries and  
146 minimize the potential impact of bias introduced by any single method. While we report  
147 delimitation results from the genes *COI* and *cytb* for all methods, we used a consensus of  
148 delimitation results (among methods and loci) for assessing the role of geography, the  
149 environment, and life history traits in predicting salamander genetic diversity.

150           To estimate a species tree for input into the GMYC, we used BEAST v2.5.1 (Bouckaert  
151 *et al.*, 2019). We used the default parameters except for conducting 100,000,000 million  
152 generations, sampling every 5,000, and setting the model of sequence evolution to GTR+I+G  
153 (Abadi *et al.*, 2019). The log files were checked by eye using Tracer v1.7.2 (Rambaut *et al.*,  
154 2018). ESS values were all over 1000 for both *cytb* and *COI*. We removed 10% as burnin and  
155 retained the maximum clade credibility tree using TreeAnnotator. After checking that the tree  
156 was binary and ultrametric, we used the R package *splits* (Ezard *et al.*, 2009) to conduct GMYC  
157 analyses. In each case we used the single threshold model and all other default settings. We  
158 conducted both ABGD and ASAP delimitation analyses via their web portals

159 (<https://bioinfo.mnhn.fr/abi/public/abgd/abgdweb.html> and  
160 <https://bioinfo.mnhn.fr/abi/public/asap/asapweb.html>, respectively) using the default parameter  
161 settings.

162

## 163 **Predictor variables**

164 A variety of predictor variables were collected, including geographic and environmental  
165 values derived from georeferenced locality data (see Data S3). In addition, three life history traits  
166 were available from AmphiBIO, a global database for amphibian ecological traits (Oliveira *et al.*,  
167 2017), for most of the species in our study: reproductive strategy (direct developing, larval  
168 phase), habitat (terrestrial, fossorial, aquatic, or some combination of these), and body size (total  
169 length). To supplement this dataset and fill in any missing trait values, we used AmphibiaWeb  
170 (AmphibiaWeb, 2023) and other online sources (Data S4).

171 To extract species specific data related to its environmental distribution, we utilized 42  
172 GIS data layers (see Data S4 for data layer details), including all 19 BIOCLIM layers from the  
173 CHELSA database (Karger *et al.*, 2017; Karger, Dirk Nikolaus *et al.*, 2021) at 1 km resolution,  
174 elevation (Aster global digital elevation model version 2, 2011), population density  
175 (Socioeconomic Data And Applications Center (SEDAC) Gridded Populations of the World  
176 (GPW), 2016), terrestrial habitat heterogeneity (Tuanmu & Jetz, 2015), gross domestic product  
177 (World Bank Development Economics Research Group (DECGR) Gross Domestic Product,  
178 2010), global land cover classification (European Space Agency, 2009), global river  
179 classification (Ouellet Dallaire *et al.*, 2019), disaster risk (Peduzzi, 2019), anthropogenic biome  
180 (Ellis *et al.*, 2010), and various indicators of seasonal growth (Karger *et al.*, 2017; Karger, Dirk  
181 Nikolaus *et al.*, 2021). We utilized the R packages 'raster' (, 2016), 'rgdal' (, 2017), 'geosphere' (,



182 2016), and 'plyr' (Wickham, 2011) to extract species specific information from each layer using  
183 geographic occurrence records obtained from *phylogatR*. To represent the environmental  
184 variation within the occupied range of each species, we extracted the value of each  
185 environmental layer for each GPS coordinate associated with each species. We then took the  
186 mean and standard deviation for each environmental variable. To obtain species specific data  
187 related to geographic distribution we extracted the minimum, maximum, mean, and length of  
188 latitude and longitude from the GPS points of each species.

189 We used the R package 'mice' (Buuren & Groothuis-Oudshoorn, 2011) to impute trait  
190 values missing from our dataset (see Figure S1 for distribution of missing data and specific trait  
191 values imputed). The imputation method 'pmm' was used for all numeric variables and 'polyreg'  
192 was used for categorical variables (i.e., reproductive strategy and habitat). We ran the imputation  
193 15 times (Figure S2) and then pooled the iterations to generate the final imputed values. The final  
194 database containing all trait values (both imputed and original) is available in Data S4.

195

## 196 **Predictive modeling**

197 We used the R package 'caret' (Kuhn, 2008) to generate a random forest classification  
198 model (Breiman, 2001) based on our previously generated database of predictor variables and a  
199 consensus of our species delimitation results. Two separate sets of consensus models were  
200 generated to assess the role of geography, environment, and life history traits on the presence of  
201 hidden diversity (Figure 1A). The first model (*all agree*) represents a strict consensus of  
202 delimitation results from species in which results from all methods of species delimitation agree  
203 (Figure 1B). Any species with conflicting delimitation results were excluded from analysis. The  
204 second model (*majority rules*) represents a majority rule consensus in which species are assigned

205 to a response category based on relative support of delimitation results (Figure 1C). For each  
206 model, we used 70% of the data to train the model and the remaining 30% was set aside as a test  
207 set. Models were generated using 10-fold cross validation with five repeats to tune the parameter  
208 'mtry', the number of variables randomly sampled at each split, and optimize the area under the  
209 receiver operating characteristic curve, ROC. After training, we extracted the variable  
210 importance measures mean decrease accuracy (MDA) and Gini impurity (Gini) from the final  
211 models. We then used the final models on the test set data to evaluate model performance. Model  
212 performance was evaluated across a variety of metrics including model accuracy, which reflects  
213 how well the predicted classifications agree with the observed classifications, and both positive  
214 and negative predictive value, which indicate the how the model performs on observations from  
215 each class. Additionally, we calculated the no information rate (NIR), the proportion of  
216 observations that fall into the majority class, and the p-value [Accuracy>NIR], to test for model  
217 significance. The top important predictor variables from our best model were compared using a  
218 Kruskal-Wallis test to determine if these variables are significantly different between species that  
219 do or do not contain hidden diversity.

220

## 221 **Results**

### 222 **Genetic and geographic dataset**

223 Our final dataset consisted of 1676 DNA barcoding sequences (Figure 2). Of these, 768  
224 sequences were from the Cytochrome oxidase I gene (*COI*), and 908 sequences were from the  
225 Cytochrome b gene (*cytb*). These sequences were derived from 83 nominal species of  
226 salamanders, which were distributed among 26 distinct genera occurring across the globe. The  
227 dataset contained 13 species with sequences from the gene *cytb*. Comparatively, *COI* exhibited

228 notably broader taxonomic coverage, with 77 nominal species represented. Out of the 83 species  
229 analyzed, only seven were shared between *COI* and *cytb*. Of the remaining 76 species, 70 were  
230 unique to *COI* and six were unique to *cytb*. To supplement the genetic data collected, a total of  
231 1765 georeferenced occurrence records from *phylogatR* were utilized to collect a combination of  
232 geographic, environmental, and life history trait values for each nominal species present in the  
233 dataset.

234

## 235 **Species delimitation and consensus assignment**

236 Species delimitation results were generated by analyzing *COI* and *cytb* sequences from  
237 each nominal species under three different delimitation methods, ABGD, ASAP, and GMYC. We  
238 classified each nominal species as either containing genetic lineages or not containing genetic  
239 lineages based on the number of genetic groups predicted by each delimitation analysis. While  
240 taxonomic overlap between *COI* and *cytb* was narrow, delimitation results for species shared by  
241 both loci were mostly congruent with respect to species classification. Of the seven species with  
242 sequences from both genes, only two species produced conflicting results regarding the presence  
243 of genetic lineages within a specific taxon based on loci. Delimitation results across different  
244 methods showed slightly less agreement. Classifications resulting from the GMYC and ASAP  
245 methods were similar across species. These methods, on average, resulted in slightly fewer  
246 predicted species per nominal species than the ABGD method (see Figure 3 for predicted species  
247 numbers).

248 To account for this variation in our final predictive models, we generated two consensus  
249 classifications to evaluate concordance between delimitation results from different methods and  
250 loci. The results of our consensus models indicate that roughly 2/3rds of the nominal salamander

251 species used in this analysis are likely to contain genetic lineages that may be unexplored  
252 diversity. The strictest of these classifications produced a consensus model (*all agree*) consisting  
253 of 51 total species, 41 of which were classified as containing hidden diversity and 10 of which  
254 were classified as not containing hidden diversity. The remaining consensus model (*majority*  
255 *rules*) consisted of 83 total species, of which 51 were classified as containing genetic lineages  
256 and 32 were not (Figure 3).

257

## 258 **Predictive modeling**

259 For our *majority rules* and *all agree* consensus classifications, we developed random  
260 forest classification models using all available predictor data. To assess potential correlation  
261 between variables in our dataset we used the R package 'corrplot' (Taiyun Wei & Viliam Simko,  
262 2021) to generate a correlation matrix of our predictor variables (Figure S3). Due to the presence  
263 of strong correlations between several of the geographic and environmental variables in our  
264 dataset we performed multiple random forest models with progressive sets of correlated variables  
265 removed at different cutoff values (i.e.,  $|\text{correlation coefficient}| > 0.75; 0.85; 0.9$ ). The results of  
266 these random forest models are presented below (Table 1).

267 All random forest models were found to have high predictive accuracy, with the *majority*  
268 *rules* and *all agree* models achieving accuracies of 75-85% and 87-93%, respectively, in  
269 identifying nominal species likely to contain hidden diversity. Although these results may  
270 initially seem to suggest that all our models are able to make meaningful predictions, further  
271 examination of additional model evaluation metrics reveals potential overfitting and inflation of  
272 predictive power. For example, despite the high accuracy of the models, the 95% confidence  
273 intervals for these values are broad with an average length of nearly 40% for most of the models

274 (Tables 1 and 2). Additionally, the no information rates (NIRs), a measure of prediction  
275 significance based on the underlying dataset that needs to be exceeded in order for model results  
276 to be significant, are particularly high for the *all agree* consensus models, where the class  
277 frequencies are more skewed towards species predicted to harbor hidden diversity. The high NIR  
278 values combined with wide confidence intervals result in a p-value [Accuracy > NIR] greater  
279 than 0.05 in all models, except for the *majority rules* consensus using a correlation cutoff of 0.90.  
280 While all our models show high accuracy, when the additional model evaluation metrics are  
281 considered only one has strong predictive power. Therefore, we only used the *majority rules*  
282 consensus using a correlation cutoff of 0.90 for interpreting variable importance of our data.  
283

## 284 **Evaluation of variable importance**

285 We extracted variable importance measurements from each predictive model using the  
286 variable importance metrics MDA and Gini. While there was some overlap of top predictors  
287 between different models (Figure 4; Figure S4), no specific predictors were consistently  
288 predicted to be of significantly higher importance than other predictors in the model. Instead,  
289 importance was split across numerous predictors that were found to be unstable between models.  
290 This instability supports previous indications that many of the predictive models are likely prone  
291 to overfitting. Despite the lack of a strong set of standout predictors across models, one pattern  
292 does emerge that is applicable to the species in our dataset. Of the top ten most important  
293 predictors in each model, approximately 85% are measurements of standard deviation (vs.  
294 measurements of mean values or life history traits) (Data S5). This is supported by further  
295 examination of our one model that was able to predict significantly better than random, the  
296 *majority rules* consensus with a correlation coefficient cutoff of 0.90, in which the top five most

297 important predictors are measurements of standard deviation. Significance testing indicates that  
298 species identified as containing hidden genetic lineages often have ranges characterized by a  
299 larger variance in annual and seasonal precipitation, isothermality, and net primary productivity  
300 than species not identified as harboring hidden genetic lineages (Figure 5).

301

## 302 **Discussion**

303         When identifying genetic lineages or delimiting species, it is important to recognize that  
304 species concepts are complex and often differ based on various factors, such as geographic  
305 location, reproductive isolating mechanisms, genetic markers, and taxonomic practices.  
306 Therefore, it is essential to approach species delimitations with caution and to recognize that they  
307 represent a hypothesis or starting point rather than a definitive answer (Hillis, 2019). In addition,  
308 while mitochondrial data can be suitable for preliminary assessments of species diversity (Gostel  
309 & Kress, 2022), these assessments should be considered in tandem with other species  
310 information and relevant data when describing species boundaries. However, with recent  
311 advances in technology rapidly increasing the quantity of publicly accessible genetic and  
312 geographic datasets, these data offer a cost effective and efficient way to explore large-scale  
313 patterns and predictors of intraspecific genetic variation (e.g., Miraldo *et al.*, 2016; Pelletier &  
314 Carstens, 2018; Yiming *et al.*, 2021).

315         Our results suggest that there are genetic lineages that may warrant further investigation  
316 distributed within Caudata. Adequately documenting biodiversity, both at the species and  
317 population level, is a first step in understanding the eco-evolutionary processes generating this  
318 diversity. However, in most clades, the Linnean shortfall is likely to influence broad scale  
319 patterns detected using macrogenetic approaches (Hortal *et al.*, 2015), making it essential to

320 consider how the taxonomic designations used to inform these approaches influence the patterns  
321 detected. This is particularly important when dealing with clades suspected of harboring high  
322 levels of cryptic diversity. For example, Miraldo *et al.* (2016) generated the first global map of  
323 genetic diversity within species of mammals and amphibians. One of their main conclusions was  
324 that amphibians displayed lower levels of genetic variation in areas with higher human impact.  
325 Similarly, in amphibians, several recent studies have found within species genetic diversity to be  
326 lower in temperate regions in species with smaller ranges and at higher elevations (Barrow *et al.*,  
327 2020; Amador 2023). The methods used to detect these patterns are based on current taxonomic  
328 knowledge, and as such, rely on the assumption that the species designations used are accurate.  
329 However, if species descriptions inaccurately reflect biological diversity, nominal species that  
330 contain cryptic species will display higher levels of genetic diversity, while not reflecting true  
331 within species variation, potentially skewing our interpretation of any patterns that result.

332

### 333 **Evaluating support for identified genetic lineages**

334 While our delimitation of genetic lineages are a starting point, or hypothesis generation  
335 step, for evaluating a species in nature where complex processes, such as hybrid zones, and  
336 adequate sampling must be considered (Hillis, 2019), we believe these computational approaches  
337 are useful for targeting species in further need of examination. We conducted a literature search  
338 to explore whether the nominal species in our dataset have been previously explored from a  
339 species delimitation approach. We used the online American Museum of Natural History  
340 taxonomic and nomenclatural database, Amphibian Species of the World (Darrel, 2024), to  
341 evaluate current taxonomic research in each nominal species of salamander predicted to contain  
342 hidden diversity in our consensus model. Species in which we were able to identify research-

343 based support for the potential of undescribed diversity were recorded, along with the related  
344 articles in which the diversity was described as well as the type of data used (see Data S7).  
345 Nearly 70% of species the majority rules consensus suggests harbor hidden lineages contain  
346 results that also support the potential splitting of species into separate lineages. Out of these  
347 about 38% were explored using mt DNA only, 10% with nuclear DNA only, 35% using a  
348 combination of both nuclear and mt DNA and 17% using mt DNA, nuclear DNA and  
349 morphology. Just under 10% of the species display a complex history of hybridization, making  
350 delimitations difficult, a situation not uncommon in salamanders (Denton *et al.*, 2018; Pyron *et*  
351 *al.*, 2020). We were unable to find results for roughly 25% of our species data. We encountered 5  
352 species in which the results of previous delimitation work was either unclear or considered  
353 highly contested (e.g., *Ichthyosaura alpestris*, *Batrachuperus karlschmidti*, *Batrachuperus*  
354 *taibaiensis*, and *Salamandrella schrenckii*). Taxonomy is dynamic field (Raposo *et al.*, 2020) and  
355 given our search, it can be difficult to use current open-source data relying solely on species  
356 names. However, the current literature largely supports the delimitation results found here and  
357 suggests a number of species in further need of investigation (see citations in Data S7, formal  
358 name changes, and an ability to update current open-source databases to reflect these changes).  
359 Additionally, even though there are limitations to using current open-source data that might not  
360 keep up to date with current taxonomy, we can still determine what factors might predict the  
361 presence of hard-to-find species.

362

## 363 **Significant Predictors of Diversity**

364       Significance testing of the most important predictors from our best model (*majority rules*  
365 consensus with a correlation coefficient cutoff of 0.90) indicates that the species which our



366 analysis identified as containing hidden genetic lineages often have ranges characterized by a  
367 larger variance in annual and seasonal precipitation, isothermality, and net primary productivity  
368 when compared to species that were not identified as containing hidden genetic lineages by our  
369 analysis (Figure 5B). And while the order of the most important traits is unstable across different  
370 models, across all models most of the traits found to be important were measurements of  
371 standard deviation (vs. measurements of mean values or life history traits) (Data S5). This  
372 suggests that the presence of variation in climate, rather than any species-specific trait or  
373 characteristic is the most identifiable driving force of within species genetic diversity for  
374 salamanders at this scale. Species traits were not a predictor of intraspecific genetic diversity in  
375 amphibians (Barrow *et al.*, 2021; Amador *et al.*, 2023) using a different measure of genetic  
376 variation within species (nucleotide diversity). Using similar methods, our results in salamanders  
377 differ from that found in mammals, where body size and range size were the most important  
378 predictors (Parsons *et al.*, 2022).

379         These findings are somewhat consistent with other studies of salamander diversification.  
380 Reproductive mode (larval stages, direct development) and habitat (combinations of terrestrial,  
381 aquatic, arboreal) vary across species and have evolved multiple times but have not been found  
382 to directly correlate with speciation, though being a direct developer might increase  
383 diversification rates (Liedtke *et al.*, 2022). Alternatively, in one species which has intraspecific  
384 variation in habit, *Salamandra salamandra*, terrestrial-breeding individuals exhibited greater  
385 geographic genetic differentiation (Lourenço *et al.*, 2019). Not surprisingly, this species showed  
386 conflicting results in our delimitation analyses. In vertebrate clades, terrestrial organisms tend to  
387 have higher diversification rates than aquatic organisms (Wiens, 2015), but we did not have a  
388 large number of fully terrestrial species in our dataset, which might have limited our ability to

389 detect this as an important predictor. Given that salamanders are relatively constrained in body  
390 form and ecological niches, variation in climatic variables seems like a reasonable explanation  
391 for species containing cryptic diversity. This follows the suggestion that change in climatic niche  
392 variables increases diversification rates in plethodontid salamanders (Kozak & Wiens, 2010).  
393 Diversification rates in frogs and salamanders have been shown to be higher near the tropics  
394 (Wiens 2007), so one might expect latitude to be an important predictor. However, latitude was  
395 not included in the list of predictor variables that were likely to be important (Figure 4).

396

### 397 **Predictive modeling as a tool to address the Linnean shortfall**

398       Recently, Parsons *et al.* (2022) used publicly available genetic barcoding data to develop  
399 a predictive framework to identify mammalian clades most likely to contain hidden species and  
400 determine specific trait complexes that indicate where hidden mammal diversity is likely to exist.  
401 We adopted a similar approach to evaluate genetic lineages in the clade Caudata, a group which  
402 differs from mammals in several key aspects, including species richness and sampling intensity.  
403 We focused on a lower taxonomic level so there are fewer recognized species of salamanders  
404 (<1000; ‘AmphibiaWeb’, 2023) compared to the mammal dataset, making the ability to produce  
405 robust predictive models more challenging. Additionally, there was a smaller proportion of  
406 available data for salamanders than mammals (~10% compared to 60% of described species).  
407 However, these smaller datasets might be more realistic in that they are more representative of  
408 the type of data most likely to be available for the taxonomic groups that are in greatest need of  
409 attention from taxonomists.

410       While the predictive models generated in this study actually have a higher overall  
411 accuracy than those used in Parsons *et al.* (2022) (see Table 3), relying on this metric alone to

412 evaluate the performance of predictive models can be misleading (Provost *et al.*, 1998). For  
413 classification models, model accuracy depends on how well the predicted classifications match  
414 the observed classifications. While seemingly straightforward, accuracy does not account for  
415 other model characteristics that may be influencing model behavior, such as the class frequencies  
416 of the underlying dataset (Kuhn & Johnson, 2013). In cases where one class occurs at a much  
417 higher frequency than the other, a predictive model can attain a high accuracy by simply always  
418 predicting the higher class. Therefore, an important benchmark to consider when interpreting  
419 overall model accuracy is the frequency at which the majority class occurs, the no information  
420 rate (NIR). If a model's accuracy is not significantly higher than the NIR (i.e., p-value [Accuracy  
421 > NIR]), it can remain unclear whether the model is making meaningful decisions. In our  
422 models, the overall accuracy was found to be high, but the 95% confidence intervals for the  
423 accuracy values are very wide for most of the models. In addition, because the dataset is skewed  
424 towards species classified as containing hidden diversity, the p-value [Accuracy > NIR] was  
425 found to be significant in only one model. This is important to point out because even though  
426 there are large datasets available, choosing the right analytical tools can remain challenging  
427 depending on the use of the predictive models. Beyond analytical tools, it's also important to  
428 consider your dataset, and how the characteristics of your dataset are affecting the results you  
429 obtain. Considering the scale of not only the dataset, but also the analytical methods used and the  
430 pattern one is attempting to examine is especially important in meta-analyses, as different  
431 patterns emerge at different scales (Gurevitch *et al.*, 2018).

432

## 433 **Conclusions**

434 Here, we chose to utilize biodiversity data from *phylogatR* (i.e., genetic data for which  
435 directly associated specimen locality information is available) to avoid potential discrepancies  
436 between the distribution of the genetic and geographic data analyzed. By doing so we hoped to  
437 gain a more fine-grain understanding of how species genetic diversity is influenced by  
438 geographic and environmental factors (Leigh *et al.*, 2021). However, making this choice  
439 significantly decreased the amount of data available and led to a greatly reduced dataset. Our  
440 study included 1676 DNA barcoding sequences from the genes *COI* and *cytb* (768 and 908  
441 sequences each, respectively). However, a 3/31/23 search of GenBank for salamander barcoding  
442 sequences from the genes *COI* and *cytb* returned a total of 17097 sequences (4468 and 12629  
443 sequences each, respectively; see Data S6). Similarly, while we were able to obtain 1765  
444 occurrence records tied to the genetic sequences used in this study, a GBIF search for geographic  
445 occurrences tied to salamander preserved specimens and material samples returned 675243  
446 records (see Data S6). This study highlights the lack of genetic data with easily-associated  
447 geographic information.

448 The numerous benefits of making biological data more broadly available have been  
449 repeatedly demonstrated (Wüest *et al.*, 2020). And recent years have seen a significant increase  
450 in the amount of available specimen and biodiversity data. The utility of these data to address  
451 large scale patterns of biodiversity, such as those examined in this study, is enhanced by our  
452 ability to integrate and synthesize data across different data sources, types, and taxonomic groups  
453 (Heberling *et al.*, 2021). Our study highlights the importance of not just making these data  
454 available, but making them available in a way that is standardized and will facilitate integration  
455 and re-use for future generations to come (e.g., Colella *et al.*, 2021; Hardisty *et al.*, 2022).

456

## 457 **Acknowledgments**

458           We thank Radford University Office of Undergraduate Research for supporting AEG  
459 through the Accelerated Research Opportunities and Research Rookies programs. We thank  
460 members of the Carstens lab for their comments on a draft of this manuscript. Funding for DJP  
461 was provided by a Presidential Fellowship from The Ohio State University and by NSF-1910623  
462 awarded to BCC.

463

## 464 **Supporting Information**

465 **File S1.** (Contains **Figure S1:** Distribution of missing data in the salamander trait database;  
466 **Figure S2:** Distribution of imputed trait data; **Figure S3:** Correlation matrix of predictor  
467 variables; **Figure S4:** Variable importance for predictive models; **Table S1:** Comparison of  
468 model accuracy confidence intervals between salamander and mammal predictive models; **Data**  
469 **S1.** Nucleotide diversity of Caudata sequences from *phylogatR*; **Data S2.** *PhylogatR*  
470 identification numbers for records analyzed; **Data S3.** Final dataset of response and predictor  
471 variables; **Data S4.** Variable specifics and source information; **Data S5.** Variable importance  
472 extended results; **Data S6.** Results of search for publicly available genetic and geographic  
473 salamander data; **Data S7.** Results of literature search for genetic lineages in recognized  
474 salamander species.

475

## 476 **Conflicts of Interest**

477 The authors declare no conflict of interest.

478

## 479 **Funding**

480 This research was funded the National Science Foundation via DBI-1911293 to TAP and DBI-  
481 1910623 to BCC.

482

## 483 **Data Availability Statement**

484 Data are uploaded to Dryad (set to private for peer review) and reviewers can access it using the  
485 following

486 link: <https://datadryad.org/stash/share/4tXXsub0cPan4BqKe1KS6l5SRGwf69F5p2zOmv7QYes>.

487 When the data is made public, the final DOI will

488 be <https://doi.org/10.5061/dryad.m63xsj474>. Code related to this manuscript, including data

489 cleaning, imputation, predictive modeling, and significance testing has been deposited in GitHub

490 (<https://github.com/parsons463/HiddenSalamanders>). All remaining data are available in the

491 manuscript and/or supporting information.

492

## 493 **References**

494 **Abadi S, Azouri D, Pupko T, Mayrose I. 2019.** Model selection may not be a mandatory step  
495 for phylogeny reconstruction. *Nature Communications* 10: 934.

496 **Amador L, Arroyo-Torres I, Lisa N. Barrow LN. 2023.** Machine learning and phylogenetic  
497 models identify predictors of genetic variation in Neotropical amphibians. *bioRxiv*.

498

499 AmphibiaWeb. 2023.

- 500 Aster global digital elevation model version 2. 2011.
- 501 **Bánki, O., Roskov, Y., Döring, M., Ower, G., Vandepitte, L., Hobern, D., Remsen, D.,**  
502 **Schalk, P., DeWalt, R. E., Keping, M., Miller, J., Orrell, T., Aalbu, R., Adlard, R.,**  
503 **Adriaenssens, E. M., Aedo, C., Aescht, E., Akkari, N., Alfenas-Zerbini, P. 2022.** Catalogue of  
504 Life Checklist (Y. Roskov, Ed.; Version 2022-05-20).
- 505 **Baranzelli MC, Cosacov A, Sede SM, Nicola MV, Sérsic AN. 2022.** Anthropocene refugia in  
506 Patagonia: A macrogenetic approach to safeguarding the biodiversity of flowering plants.  
507 *Biological Conservation* 268: 109492.
- 508 **Barrow LN, Fonseca EM, Thompson CEP, Carstens BC. 2021.** Predicting amphibian  
509 intraspecific genetic diversity with machine learning: Challenges and prospects for integrating  
510 traits, geography, and genetic data, *Molecular Ecology Resources* 21: 2718-2831.
- 511 **Bernardes M, Le MD, Nguyen TQ, Pham CT, Pham AV, Nguyen TT, Rödder D, Bonkowski**  
512 **M, Ziegler T. 2020.** Integrative taxonomy reveals three new taxa within the *Tylostotriton*  
513 *aspermus* complex (Caudata, Salamandridae) from Vietnam. *ZooKeys* 935: 121–164.
- 514 **Bickford D, Lohman DJ, Sodhi NS, Ng PKL, Meier R, Winker K, Ingram KK, Das I. 2007.**  
515 Cryptic species as a window on diversity and conservation. *Trends in Ecology & Evolution* 22:  
516 148–155.
- 517 **Blanchet S, Prunier JG, De Kort H. 2017.** Time to Go Bigger: Emerging Patterns in  
518 Macrogenetics. *Trends in Genetics* 33: 579–580.

- 519 **Bouckaert R, Vaughan TG, Barido-Sottani J, Duchêne S, Fourment M, Gavryushkina A,**  
520 **Heled J, Jones G, Kühnert D, De Maio N, Matschiner M, Mendes FK, Müller NE, Ogilvie**  
521 **HA, du Plessis L, Poppinga A, Rambaut A, Rasmussen D, Siveroni I, Suchard MA, Wu CH,**  
522 **Xie D, Zhang C, Stadler T, Drummond AJ. 2019.** BEAST 2.5: An advanced software platform  
523 for Bayesian evolutionary analysis (M Perteza, Ed.). *PLOS Computational Biology* 15: e1006650.
- 524 **Breiman L. 2001.** Random Forests. *Machine Learning* 45: 5–32.
- 525 **Buuren S van, Groothuis-Oudshoorn K. 2011.** mice : Multivariate Imputation by Chained  
526 Equations in R. *Journal of Statistical Software* 45.
- 527 **Camp CD, Wooten JA. 2016.** Hidden in Plain Sight: Cryptic Diversity in the Plethodontidae.  
528 *Copeia* 104: 111–117.
- 529 **Carstens BC, Morales AE, Field K, Pelletier TA. 2018.** A global analysis of bats using  
530 automated comparative phylogeography uncovers a surprising impact of Pleistocene glaciation.  
531 *Journal of Biogeography* 45: 1795–1805.
- 532 **Carstens BC, Pelletier TA, Reid NM, Satler JD. 2013.** How to fail at species delimitation.  
533 *Molecular Ecology* 22: 4369–4383.
- 534 **Colella JP, Stephens RB, Campbell ML, Kohli BA, Parsons DJ, Mclean BS. 2021.** The  
535 Open-Specimen Movement. *BioScience* 71: 405–414.
- 536 **Darrel FR. 2024.** Amphibian Species of the World: an Online Reference. Version 6.2  
537 (December 2023). Electronic Database accessible



538 at <https://amphibiansoftheworld.amnh.org/index.php>. *American Museum of Natural History*,  
539 New York, USA.

540  
541 **Denton RD, Morales AE, Gibbs HL. 2018.** Genome-specific histories of divergence and  
542 introgression between an allopolyploid unisexual salamander lineage and two ancestral sexual  
543 species. *Evolution*. 72: 1689–1700.

544  
545 **Dufresnes C, Brelsford A, Jeffries DL, Mazepa G, Suchan T, Canestrelli D, Nicieza A,**  
546 **Fumagalli L, Dubey S, Martínez-Solano I, Litvinchuk SN, Vences M, Perrin N, Crochet PA.**  
547 **2021.** Mass of genes rather than master genes underlie the genomic architecture of amphibian  
548 speciation. *Proceedings of the National Academy of Sciences* 118: e2103963118.

549 **Ellis EC, Klein Goldewijk K, Siebert S, Lightman D, Ramankutty N. 2010.** Anthropogenic  
550 transformation of the biomes, 1700 to 2000: Anthropogenic transformation of the biomes. *Global*  
551 *Ecology and Biogeography*: no-no.

552 **European Space Agency. 2009.** ESA GlobCover project.

553 **Foster J. Provost, Tom Fawcett, Ron Kohavi. 1998.** The Case against Accuracy Estimation for  
554 Comparing Induction Algorithms. *Machine learning: proceedings of the fifteenth international*  
555 *conference, Madison, Wisconsin, July 24 - 27, 1998*. San Francisco, Calif: Morgan Kaufmann.

556 **Fonseca EM, Pelletier TA, Decker SK, Parsons DJ, Carstens BC. 2023.** Pleistocene  
557 glaciations caused the latitudinal gradient of within-species genetic diversity, *Evolution Letters* 7:  
558 331–338.

559 **Gadelha LMR, Siracusa PC, Dalcin EC, Silva LAE, Augusto DA, Krempser E, Affe HM,**  
560 **Costa RL, Mondelli ML, Meirelles PM, Thompson F, Chame M, Ziviani A, Siqueira MF.**  
561 **2021.** A survey of biodiversity informatics: Concepts, practices, and challenges. *WIREs Data*  
562 *Mining and Knowledge Discovery* 11.

563 Geosphere: Spherical trigonometry. **2016.**

564 **Gostel MR, Kress WJ. 2022.** The Expanding Role of DNA Barcodes: Indispensable Tools for  
565 Ecology, Evolution, and Conservation. *Diversity* 14: 213.

566 **Gratton P, Marta S, Bocksberger G, Winter M, Keil P, Trucchi E, Kühl H. 2017.** Which  
567 Latitudinal Gradients for Genetic Diversity? *Trends in Ecology & Evolution* 32: 724–726.

568 **Guralnick R, Hill A. 2009.** Biodiversity informatics: automated approaches for documenting  
569 global biodiversity patterns and processes. *Bioinformatics* 25: 421–428.

570 **Gurevitch J, Koricheva J, Nakagawa S, Stewart G. 2018.** Meta-analysis and the science of  
571 research synthesis. *Nature* 555: 175–182.

572 **Hardisty AR, Ellwood ER, Nelson G, Zimkus B, Buschbom J, Addink W, Rabeler RK,**  
573 **Bates J, Bentley A, Fortes JAB, Hansen S, Macklin JA, Mast AR, Miller JT, Monfils AK,**  
574 **Paul DL, Wallis E, Webster M. 2022.** Digital Extended Specimens: Enabling an Extensible  
575 Network of Biodiversity Data Records as Integrated Digital Objects on the Internet. *BioScience*  
576 72: 978–987.

577 **Heberling JM, Miller JT, Noesgaard D, Weingart SB, Schigel D. 2021.** Data integration  
578 enables global biodiversity synthesis. *Proceedings of the National Academy of Sciences* 118:  
579 e2018093118.

580 **Hillis DM. 2019.** Species Delimitation in Herpetology. *Journal of Herpetology* 53: 3.

581 **Hortal J, de Bello F, Diniz-Filho JAF, Lewinsohn TM, Lobo JM, Ladle RJ. 2015.** Seven  
582 Shortfalls that Beset Large-Scale Knowledge of Biodiversity. *Annual Review of Ecology,*  
583 *Evolution, and Systematics* 46: 523–549.

584 **Jockusch EL, Martínez-Solano I, Hansen RW, Wake DB. 2012.** Morphological and molecular  
585 diversification of slender salamanders (Caudata: Plethodontidae: Batrachoseps) in the southern  
586 Sierra Nevada of California with descriptions of two new species. *Zootaxa* 3190: 1.

587 **Jones KS, Weisrock DW. 2018.** Genomic data reject the hypothesis of sympatric ecological  
588 speciation in a clade of *Desmognathus* salamanders. *Evolution* 72: 2378–2393.

589  
590 **Karger DN, Conrad O, Böhner J, Kawohl T, Kreft H, Soria-Auza RW, Zimmermann NE,**  
591 **Linder HP, Kessler M. 2017.** Climatologies at high resolution for the earth’s land surface areas.  
592 *Scientific Data* 4: 170122.

593 **Karger, Dirk Nikolaus, Conrad, Olaf, Böhner, Jürgen, Kawohl, Tobias, Kreft, Holger,**  
594 **Soria-Auza, Rodrigo Wilber, Zimmermann, Niklaus E., Linder, H. Peter, Kessler, Michael.**  
595 **2021.** Climatologies at high resolution for the earth’s land surface areas CHELSA V2.1 (current).  
596 : 2.1 KB.

- 597 **Katoh K, Standley DM. 2013.** MAFFT Multiple Sequence Alignment Software Version 7:  
598 Improvements in Performance and Usability. *Molecular Biology and Evolution* 30: 772–780.
- 599 **Kozak KH, Wiens JJ. 2010.** Accelerated rates of climatic-niche evolution underlie rapid species  
600 diversification: Niche evolution and rapid diversification. *Ecology Letters* 13: 1378–1389.
- 601 **Kuchta SR, Brown AD, Highton R. 2018.** Disintegrating over space and time: Paraphyly and  
602 species delimitation in the Wehrle’s Salamander complex. *Zoologica Scripta* 47: 285–299.
- 603 **Kuhn M. 2008.** Building Predictive Models in *R* Using the **caret** Package. *Journal of Statistical*  
604 *Software* 28.
- 605 **Kuhn M, Johnson K. 2013.** *Applied Predictive Modeling*. New York, NY: Springer New York.
- 606 **Leigh DM, van Rees CB, Millette KL, Breed MF, Schmidt C, Bertola LD, Hand BK,**  
607 **Hunter ME, Jensen EL, Kershaw F, Liggins L, Luikart G, Manel S, Mergeay J, Miller JM,**  
608 **Segelbacher G, Hoban S, Paz-Vinas I. 2021.** Opportunities and challenges of macrogenetic  
609 studies. *Nature Reviews Genetics* 22: 791–807.
- 610 **Liedtke HC, Wiens JJ, Gomez-Mestre I. 2022.** The evolution of reproductive modes and life  
611 cycles in amphibians. *Nature Communications* 13: 7039.
- 612 **Lourenço A, Gonçalves J, Carvalho F, Wang IJ, Velo-Antón G. 2019.** Comparative landscape  
613 genetics reveals the evolution of viviparity reduces genetic connectivity in fire salamanders.  
614 *Molecular Ecology* 28: 4573–4591.
- 615 **Lyman RA, Edwards CE. 2022.** Revisiting the comparative phylogeography of unglaciated  
616 eastern North America: 15 years of patterns and progress. *Ecology and Evolution* 12.

- 617 **M. Keeseey.** PhyloPic.
- 618 **Mable BK. 2019.** Conservation of adaptive potential and functional diversity: integrating old  
619 and new approaches. *Conservation Genetics* 20: 89–100.
- 620 **Mead LS, Clayton DR, Nauman RS, Olson DH, Pfrender ME. 2005.** Newly discovered  
621 populations of salamanders from Siskiyou County California represent a species distinct from  
622 *Plethodon stormi*. *Herpetologica* 61: 158–177.
- 623 Mesquite: a modular system for evolutionary analysis. **2021.**
- 624 **Millette KL, Fugère V, Debyser C, Greiner A, Chain FJJ, Gonzalez A. 2020.** No consistent  
625 effects of humans on animal genetic diversity worldwide (A Mooers, Ed.). *Ecology Letters* 23:  
626 55–67.
- 627 **Min MS, Baek HJ, Song JY, Chang MH, Poyarkov NA Jr. 2016.** A new species of salamander  
628 of the genus *Hynobius* (Amphibia, Caudata, Hynobiidae) from South Korea. *Zootaxa* 4169: 475.
- 629 **Miraldo A, Li S, Borregaard MK, Flórez-Rodríguez A, Gopalakrishnan S, Rizvanovic M,**  
630 **Wang Z, Rahbek C, Marske KA, Nogués-Bravo D. 2016.** An Anthropocene map of genetic  
631 diversity. *Science* 353: 1532–1535.
- 632 **Mora C, Tittensor DP, Adl S, Simpson AGB, Worm B. 2011.** How Many Species Are There on  
633 Earth and in the Ocean? (GM Mace, Ed.). *PLoS Biology* 9: e1001127.
- 634 **Moritz C. 1994.** Defining ‘Evolutionarily Significant Units’ for conservation. *Trends in Ecology*  
635 *& Evolution* 9: 373–375.

- 636 **Mueller RL, Macey JR, Jaekel M, Wake DB, Boore JL. 2004.** Morphological homoplasy, life  
637 history evolution, and historical biogeography of plethodontid salamanders inferred from  
638 complete mitochondrial genomes. *Proceedings of the National Academy of Sciences* 101: 13820–  
639 13825.
- 640 **Nauman RS, Olson DH. 2008.** Distribution and Conservation Of Plethodon Salamanders On  
641 Federal Lands In Siskiyou County, California. *Northwestern Naturalist* 89: 1.
- 642 **Nishikawa K, Matsui M. 2014.** Three new species of the salamander genus *Hynobius*  
643 (Amphibia, Urodela, Hynobiidae) from Kyushu, Japan. *Zootaxa* 3852: 203.
- 644 **Okamiya H, Sugawara H, Nagano M, Poyarkov NA. 2018.** An integrative taxonomic analysis  
645 reveals a new species of lotic *Hynobius* salamander from Japan. *PeerJ* 6: e5084.
- 646 **Oliveira BF, São-Pedro VA, Santos-Barrera G, Penone C, Costa GC. 2017.** AmphiBIO, a  
647 global database for amphibian ecological traits. *Scientific Data* 4: 170123.
- 648 **Ouellet Dallaire C, Lehner B, Sayre R, Thieme M. 2019.** A multidisciplinary framework to  
649 derive global river reach classifications at high spatial resolution. *Environmental Research*  
650 *Letters* 14: 024003.
- 651 **Parra Olea G, Garcia-Castillo MG, Rovito SM, Maisano JA, Hanken J, Wake DB. 2020.**  
652 Descriptions of five new species of the salamander genus *Chiropterotriton* (Caudata:  
653 Plethodontidae) from eastern Mexico and the status of three currently recognized taxa. *PeerJ* 8:  
654 e8800.

- 655 **Parsons DJ, Pelletier TA, Wieringa JG, Duckett DJ, Bryan C. Carstens. 2022.** Analysis of  
656 biodiversity data suggests that mammal species are hidden in predictable places. *Proceedings of*  
657 *the National Academy of Sciences* 119: e2103400119.
- 658 **Peduzzi P. 2019.** The Disaster Risk, Global Change, and Sustainability Nexus. *Sustainability* 11:  
659 957.
- 660 **Pelletier TA, Carstens BC. 2016.** Comparing range evolution in two western *Plethodon*  
661 salamanders: glacial refugia, competition, ecological niches, and spatial sorting. *Journal of*  
662 *Biogeography* 43: 2237–2249.
- 663 **Pelletier TA, Carstens BC. 2018.** Geographical range size and latitude predict population  
664 genetic structure in a global survey. *Biology Letters* 14: 20170566.
- 665 **Pelletier TA, Carstens BC, Tank DC, Sullivan J, Espíndola A. 2018.** Predicting plant  
666 conservation priorities on a global scale. *Proceedings of the National Academy of Sciences* 115:  
667 13027–13032.
- 668 **Pelletier TA, Crisafulli C, Wagner S, Zellmer AJ, Carstens BC. 2015.** Historical Species  
669 Distribution Models Predict Species Limits in Western *Plethodon* Salamanders. *Systematic*  
670 *Biology* 64: 909–925.
- 671 **Pelletier TA, Duffield DA, DeGrauw EA. 2011.** Rangewide Phylogeography of the Western  
672 Red-Backed Salamander (*Plethodon vehiculum*). *Northwestern Naturalist* 92: 200–210.

- 673 **Pelletier TA, Parsons DJ, Decker SK, Crouch S, Franz E, Ohrstrom J, Carstens BC. 2022.**  
674 PhylogatR: Phylogeographic data aggregation and repurposing. *Molecular Ecology Resources*  
675 22: 2830–2842.
- 676 **Pfenninger M, Schwenk K. 2007.** Cryptic animal species are homogeneously distributed among  
677 taxa and biogeographical regions. *BMC Evolutionary Biology* 7: 121.
- 678 **Pons J, Barraclough TG, Gomez-Zurita J, Cardoso A, Duran DP, Hazell S, Kamoun S,**  
679 **Sumlin WD, Vogler AP. 2006.** Sequence-Based Species Delimitation for the DNA Taxonomy of  
680 Undescribed Insects (M Hedin, Ed.). *Systematic Biology* 55: 595–609.
- 681 **Puillandre N, Brouillet S, Achaz G. 2021.** ASAP: assemble species by automatic partitioning.  
682 *Molecular Ecology Resources* 21: 609–620.
- 683 **Puillandre N, Lambert A, Brouillet S, Achaz G. 2012.** ABGD, Automatic Barcode Gap  
684 Discovery for primary species delimitation: ABGD, AUTOMATIC BARCODE GAP  
685 DISCOVERY. *Molecular Ecology* 21: 1864–1877.
- 686 **Pyron RA, O'Connell KA, Lemmon EM, Lemmon AR, Beamer DA. 2020.** Phylogenomic  
687 data reveal reticulation and incongruence among mitochondrial candidate species in Dusky  
688 Salamanders (*Desmognathus*). *Molecular Phylogenetics and Evolution*. 146: 1055-7903.
- 689  
690 **Rambaut A, Drummond AJ, Xie D, Baele G, Suchard MA. 2018.** Posterior Summarization in  
691 Bayesian Phylogenetics Using Tracer 1.7 (E Susko, Ed.). *Systematic Biology* 67: 901–904.



692 **Raposo MA, Kirwan GM, Lourenço ACC, Sobral G, Bockmann FA, Stopiglia R. 2021.** On  
693 the notions of taxonomic ‘impediment’, ‘gap’, ‘inflation’ and ‘anarchy’, and their effects on the  
694 field of conservation. *Systematics and Biodiversity* 19: 296–311.

695 **Raposo MA, Kirwan GM, Lourenço ACC, Sobral G, Bockmann FA, Stopiglia R. 2021.** On  
696 the notions of taxonomic ‘impediment’, ‘gap’, ‘inflation’ and ‘anarchy’, and their effects on the  
697 field of conservation. *Systematics and Biodiversity*. 19: 296-311.

698  
699 raster: Geographic data analysis and modeling. **2016.**

700 rgdal: Bindings for the Geospatial Data Abstraction Library. **2017.**

701 Socioeconomic Data And Applications Center (SEDAC) Gridded Populations of the World  
702 (GPW). **2016.**

703 **Steffen MA, Irwin KJ, Blair AL, Bonett RM. 2014.** Larval masquerade: a new species of  
704 paedomorphic salamander (Caudata: Plethodontidae: Eurycea) from the Ouachita Mountains of  
705 North America. *Zootaxa* 3786: 423.

706 **T. Ezard, T. Fujisawa, T. G. Barraclough. 2009.** SPLITS: species’ limits by threshold  
707 statistics.

708 **Taiyun Wei, Viliam Simko. 2021.** R package ‘corrplot’: Visualization of a Correlation Matrix.  
709 (Version 0.92).

710 **Tuanmu MN, Jetz W. 2015.** A global, remote sensing-based characterization of terrestrial  
711 habitat heterogeneity for biodiversity and ecosystem modelling: Global habitat heterogeneity.  
712 *Global Ecology and Biogeography* 24: 1329–1339.

- 713 **Whittaker RJ, Araújo MB, Jepson P, Ladle RJ, Watson JEM, Willis KJ. 2005.** Conservation  
714 Biogeography: assessment and prospect: Conservation Biogeography. *Diversity and*  
715 *Distributions* 11: 3–23.
- 716 **Wickham H. 2011.** The Split-Apply-Combine Strategy for Data Analysis. *Journal of Statistical*  
717 *Software* 40.
- 718 **Wiens JJ. 2015.** Explaining large-scale patterns of vertebrate diversity. *Biology Letters* 11:  
719 20150506.
- 720 World Bank Development Economics Research Group (DECGR) Gross Domestic Product. **2010.**
- 721 **Wüest RO, Zimmermann NE, Zurell D, Alexander JM, Fritz SA, Hof C, Kreft H, Normand**  
722 **S, Cabral JS, Szekely E, Thuiller W, Wikelski M, Karger DN. 2020.** Macroecology in the age  
723 of Big Data – Where to go from here? *Journal of Biogeography* 47: 1–12.
- 724 **Yiming L, Siqi W, Chaoyuan C, Jiaqi Z, Supen W, Xianglei H, Xuan L, Xuejiao Y,**  
725 **Xianping L. 2021.** Latitudinal gradients in genetic diversity and natural selection at a highly  
726 adaptive gene in terrestrial mammals. *Ecography* 44: 206–218.

727

728

729

730

731

732

733 **Table 1.** Results of *majority rules* consensus predictive models. Model metrics for each random forest predictive  
 734 model generated using the *majority rules* consensus classifications are shown.

735

| Majority Rules<br>Models | Original         | Correlation  > 0.75 | Correlation  > 0.85 | Correlation  > 0.90 |
|--------------------------|------------------|---------------------|---------------------|---------------------|
| Accuracy                 | 0.75             | 0.75                | 0.75                | 0.8333              |
| Accuracy (95% CI)        | (0.5329, 0.9023) | (0.5329, 0.9023)    | (0.5329, 0.9023)    | (0.6262, 0.9526)    |
| No Information Rate      | 0.625            | 0.625               | 0.625               | 0.625               |
| Pos Pred Value           | 0.7368a          | 0.8                 | 0.7647              | 0.7895              |
| Neg Pred Value           | 0.8              | 0.6667              | 0.7143              | 1                   |
| P-Value [Acc > NIR]      | 0.1453           | 0.1453              | 0.1453              | 0.02435             |

736

737 **Table 2.** Results of *all agree* consensus predictive models. Model metrics for each random forest predictive model  
 738 generated using the *all agree* consensus classifications are shown.

739

| All Agree Models    | Original         | Correlation  > 0.75 | Correlation  > 0.85 | Correlation  > 0.90 |
|---------------------|------------------|---------------------|---------------------|---------------------|
| Accuracy            | 0.8667           | 0.9333              | 0.8667              | 0.8667              |
| Accuracy (95% CI)   | (0.5954, 0.9834) | (0.6805, 0.9983)    | (0.5954, 0.9834)    | (0.5954, 0.9834)    |
| No Information Rate | 0.8              | 0.8                 | 0.8                 | 0.8                 |
| Pos Pred Value      | 0.8571           | 0.9231              | 0.8571              | 0.8571              |
| Neg Pred Value      | 1                | 1                   | 1                   | 1                   |
| P-Value [Acc > NIR] | 0.398            | 0.1671              | 0.398               | 0.398               |

740

741 **Table 3.** Summary of results of mammal predictive models presented in Parsons *et al.* (Parsons *et al.*, 2022). Model  
742 metrics for each random forest predictive model generated using data from the class Mammalia are shown.

743

| Mammal Models     | ABGD COI         | ABGD cytb        | GMYC COI         | GMYC cytb        | consensus        |
|-------------------|------------------|------------------|------------------|------------------|------------------|
| Accuracy          | 0.737            | 0.68             | 0.6429           | 0.6517           | 0.781            |
| Accuracy (95% CI) | (0.6802, 0.7885) | (0.6333, 0.7241) | (0.5821, 0.7004) | (0.6014, 0.6996) | (0.7273, 0.8285) |
| No Information    |                  |                  |                  |                  |                  |
| Rate              | 0.7222           | 0.6235           | 0.6128           | 0.5488           | 0.6533           |
| Pos Pred Value    | 0.56667          | 0.6304           | 0.17271          | 0.6624           | 2.85E-06         |
| Neg Pred Value    | 0.75833          | 0.6937           | 0.5571           | 0.6345           | 0.807            |
| P-Value [Acc >    |                  |                  |                  |                  |                  |
| NIR]              | 0.32             | 0.008792         | 0.6735           | 3.00E-05         | 2.85E-06         |

744

745

746

747

748

749

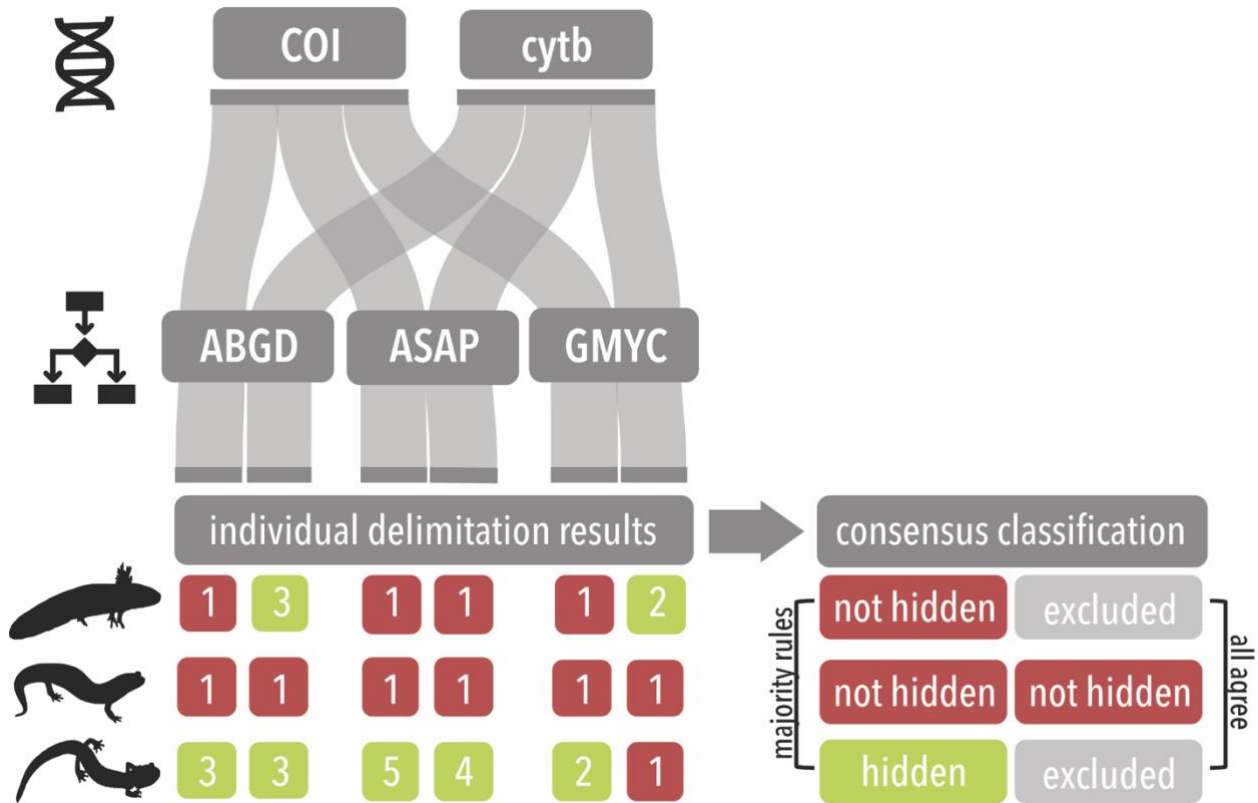

750

751 **Figure 1.** Consensus classification of species delimitation results. A, Flowchart describing the process of generating  
752 a consensus of delimitation results (among different methods and loci). B, C, Pipeline for classifying nominal species  
753 as either containing or not containing hidden diversity in each consensus analysis (*all agree* and *majority rules*,  
754 respectively).

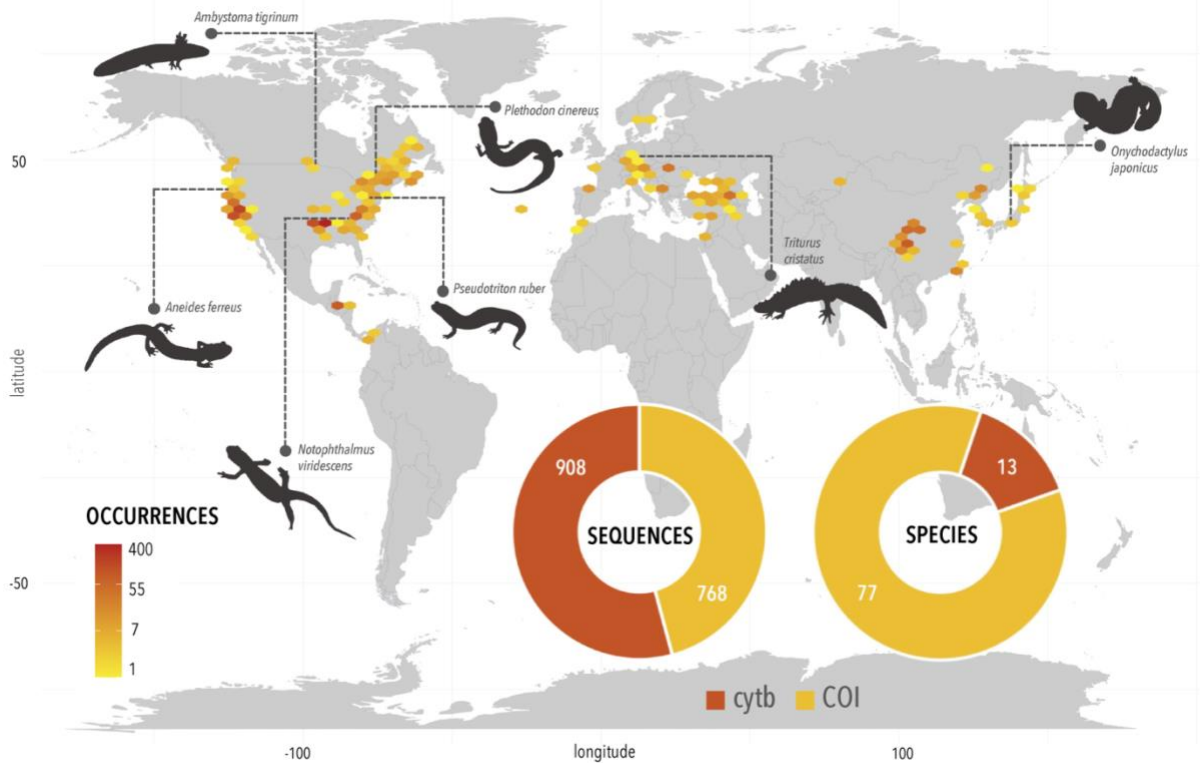

755

756 **Figure 2.** Geographic spread of salamander data. Map shows geographic distribution of salamander occurrences  
757 pulled from *phylogatR* (Pelletier *et al.*, 2022) and used in these analyses. Pie charts show the total number of *cytb* and  
758 *COI* sequences used (left) and the number of species represented by those *cytb* and *COI* sequences (right). Salamander  
759 figures in black were obtained from Phylopic (M. Keesey) and are licensed under public domain.

760

761

762

763

764

765

766

**A**

| Species                                          | COI  |      |      | cytb |      |      | Species (cont.)                                    | COI  |      |      | cytb |      |      |
|--------------------------------------------------|------|------|------|------|------|------|----------------------------------------------------|------|------|------|------|------|------|
|                                                  | GMYC | ABGD | ASAP | GMYC | ABGD | ASAP |                                                    | GMYC | ABGD | ASAP | GMYC | ABGD | ASAP |
| <i>Ambystoma annulatum</i>                       | 1    | 1    | 1    | -    | -    | -    | <i>Lissotriton boscai</i>                          | 1    | 1    | 1    | -    | -    | -    |
| <i>Ambystoma californiense</i>                   | 1    | 2    | 1    | -    | -    | -    | <i>Lissotriton helveticus</i>                      | 1    | 1    | 1    | -    | -    | -    |
| <i>Ambystoma laterale</i>                        | 1    | 2    | 1    | -    | -    | -    | <i>Lissotriton montandoni</i>                      | 1    | 3    | 1    | -    | -    | -    |
| <i>Ambystoma laterale jeffersonianum</i> complex | 6    | 9    | 4    | -    | -    | -    | <i>Lissotriton vulgaris</i>                        | 2    | 6    | 2    | -    | -    | -    |
| <i>Ambystoma opacum</i>                          | 1    | 2    | 1    | -    | -    | -    | <i>Mertensiella caucasica</i>                      | 4    | 13   | 3    | -    | -    | -    |
| <i>Ambystoma talpoideum</i>                      | 1    | 3    | 1    | -    | -    | -    | <i>Neureergus crocatus</i>                         | 1    | 3    | 1    | -    | -    | -    |
| <i>Ambystoma texanum</i>                         | 2    | 3    | 2    | -    | -    | -    | <i>Notophthalmus viridescens</i>                   | 2    | 3    | 1    | -    | -    | -    |
| <i>Ambystoma tigrinum</i>                        | 1    | 2    | 1    | -    | -    | -    | <i>Nototriton mime</i>                             | 1    | 3    | 1    | -    | -    | -    |
| <i>Aneides ferreus</i>                           | 5    | 7    | 4    | -    | -    | -    | <i>Ommatotriton nesterovi</i>                      | 3    | 16   | 2    | -    | -    | -    |
| <i>Aneides flavipunctatus</i>                    | 7    | 7    | 5    | -    | -    | -    | <i>Ommatotriton ophryticus</i>                     | 5    | 11   | 5    | -    | -    | -    |
| <i>Aneides lugubris</i>                          | 4    | 5    | 2    | -    | -    | -    | <i>Ommatotriton vittatus</i>                       | 4    | 14   | 4    | -    | -    | -    |
| <i>Aneides vagrans</i>                           | 3    | 3    | 1    | -    | -    | -    | <i>Onychodactylus japonicus</i>                    | 2    | 3    | 2    | -    | -    | -    |
| <i>Batrachoseps attenuatus</i>                   | 1    | 4    | 1    | 3    | 10   | 9    | <i>Plethodon cinereus</i>                          | 2    | 9    | 2    | -    | -    | -    |
| <i>Batrachoseps major</i>                        | 1    | 3    | 1    | -    | -    | -    | <i>Plethodon fourchensis</i>                       | -    | -    | -    | 3    | 6    | 9    |
| <i>Batrachuperus karlschmidti</i>                | 4    | 8    | 2    | 4    | 8    | 10   | <i>Plethodon glutinosus</i>                        | 1    | 3    | 1    | -    | -    | -    |
| <i>Batrachuperus londongensis</i>                | 1    | 2    | 1    | 2    | 6    | 4    | <i>Plethodon hubrichti</i>                         | 1    | 2    | 1    | -    | -    | -    |
| <i>Batrachuperus pinchonii</i>                   | 4    | 6    | 3    | 5    | 13   | 11   | <i>Plethodon montanus</i>                          | 3    | 6    | 3    | -    | -    | -    |
| <i>Batrachuperus taibaiensis</i>                 | 5    | 10   | 3    | 5    | 6    | 9    | <i>Plethodon ouachitae</i>                         | -    | -    | -    | 13   | 27   | 42   |
| <i>Batrachuperus tibetanus</i>                   | 4    | 9    | 3    | 7    | 21   | 19   | <i>Plethodon richmondi</i>                         | 1    | 1    | 1    | -    | -    | -    |
| <i>Batrachuperus yenyuanensis</i>                | -    | -    | -    | 3    | 4    | 5    | <i>Plethodon serratus</i>                          | 2    | 3    | 2    | 3    | 10   | 11   |
| <i>Bolitoglossa medemi</i>                       | 2    | 2    | 2    | -    | -    | -    | <i>Plethodon sherando</i>                          | 1    | 4    | 1    | -    | -    | -    |
| <i>Bolitoglossa porrasorum</i>                   | 3    | 24   | 2    | -    | -    | -    | <i>Plethodon shermani</i>                          | -    | -    | -    | 3    | 3    | 3    |
| <i>Bolitoglossa rufescens</i>                    | 3    | 4    | 2    | -    | -    | -    | <i>Plethodon vehiculum</i>                         | 1    | 1    | 1    | -    | -    | -    |
| <i>Bolitoglossa taylori</i>                      | 2    | 5    | 2    | -    | -    | -    | <i>Plethodon wehrlei</i>                           | 2    | 4    | 2    | -    | -    | -    |
| <i>Desmognathus fuscus</i>                       | 5    | 8    | 2    | -    | -    | -    | <i>Pleurodeles waltl</i>                           | 2    | 2    | 2    | -    | -    | -    |
| <i>Desmognathus monticola</i>                    | 3    | 7    | 3    | -    | -    | -    | <i>Pseudotriton ruber</i>                          | 2    | 4    | 2    | -    | -    | -    |
| <i>Desmognathus ochrophaeus</i>                  | 2    | 3    | 2    | -    | -    | -    | <i>Ranodon sibiricus</i>                           | 1    | 1    | 1    | -    | -    | -    |
| <i>Desmognathus orestes</i>                      | 1    | 4    | 1    | -    | -    | -    | <i>Salamandra salamandra</i>                       | 2    | 8    | 1    | -    | -    | -    |
| <i>Desmognathus organi</i>                       | 1    | 1    | 1    | -    | -    | -    | <i>Salamandrella keyserlingii</i>                  | 2    | 2    | 1    | -    | -    | -    |
| <i>Desmognathus quadramaculatus</i>              | 2    | 4    | 2    | -    | -    | -    | <i>Salamandrella schrenckii</i>                    | 3    | 8    | 3    | -    | -    | -    |
| <i>Dicamptodon ensatus</i>                       | 1    | 1    | 1    | -    | -    | -    | <i>Triturus carnifex</i>                           | 1    | 3    | 2    | -    | -    | -    |
| <i>Ensatina eschscholtzii</i>                    | -    | -    | -    | 38   | 107  | 92   | <i>Triturus cristatus</i>                          | 2    | 5    | 1    | -    | -    | -    |
| <i>Eurycea bislineata</i>                        | 1    | 7    | 1    | -    | -    | -    | <i>Triturus cristatus x dobrogricus macrosomus</i> | 1    | 2    | 1    | -    | -    | -    |
| <i>Eurycea cirrigera</i>                         | 3    | 9    | 3    | -    | -    | -    | <i>Triturus dobrogricus</i>                        | 1    | 1    | 1    | -    | -    | -    |
| <i>Eurycea guttolineata</i>                      | 2    | 3    | 1    | -    | -    | -    | <i>Triturus karelinii</i>                          | 1    | 5    | 1    | -    | -    | -    |
| <i>Eurycea subfluvicola</i>                      | -    | -    | -    | 1    | 1    | 1    |                                                    |      |      |      |      |      |      |
| <i>Eurycea wilderae</i>                          | 1    | 3    | 1    | -    | -    | -    |                                                    |      |      |      |      |      |      |
| <i>Gyrinophilus porphyriticus</i>                | 3    | 4    | 1    | -    | -    | -    |                                                    |      |      |      |      |      |      |
| <i>Hemidactylium scutatum</i>                    | 3    | 4    | 3    | -    | -    | -    |                                                    |      |      |      |      |      |      |
| <i>Hynobius amjiensis</i>                        | 1    | 2    | 1    | -    | -    | -    |                                                    |      |      |      |      |      |      |
| <i>Hynobius arisanensis</i>                      | 1    | 4    | 1    | -    | -    | -    |                                                    |      |      |      |      |      |      |
| <i>Hynobius formosanus</i>                       | 1    | 3    | 1    | -    | -    | -    |                                                    |      |      |      |      |      |      |
| <i>Hynobius fuca</i>                             | 3    | 3    | 2    | -    | -    | -    |                                                    |      |      |      |      |      |      |
| <i>Hynobius leechii</i>                          | 2    | 5    | 2    | -    | -    | -    |                                                    |      |      |      |      |      |      |
| <i>Hynobius retardatus</i>                       | 1    | 2    | 1    | -    | -    | -    |                                                    |      |      |      |      |      |      |
| <i>Hynobius sonani</i>                           | 1    | 3    | 1    | -    | -    | -    |                                                    |      |      |      |      |      |      |
| <i>Hynobius tsuensis</i>                         | 2    | 2    | 2    | -    | -    | -    |                                                    |      |      |      |      |      |      |
| <i>Ichthyosaura alpestris</i>                    | 5    | 12   | 4    | -    | -    | -    |                                                    |      |      |      |      |      |      |

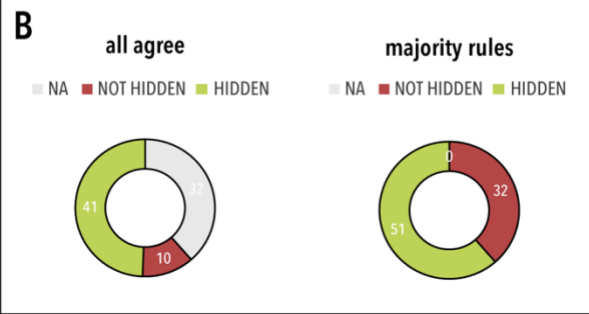

767

768 **Figure 3.** Species delimitation results. A, Graphs show the results of ABGD, ASAP, and GMYC species delimitation  
769 analyses of the genes *cytb* and *COI* for each nominal species. Numbers represent the predicted genetic lineages from  
770 each analysis. Results highlighted in red indicate no hidden genetic lineages were predicted (i.e., number of genetic  
771 lineages = 1). Results highlighted in green indicate hidden genetic lineages were predicted (i.e., number of genetic  
772 lineages > 1). Grey highlighting indicates that specific analysis was not performed due to a lack of data. B, Pie charts

773 display the number of nominal species classified as either containing or not containing hidden diversity in each  
774 consensus analysis (i.e., *all agree* and *majority rules*).

775

776

777

778

779

780

781

782

783

784

785

786

787

788

789

790

791

792

793

794

795

796

797

798

799



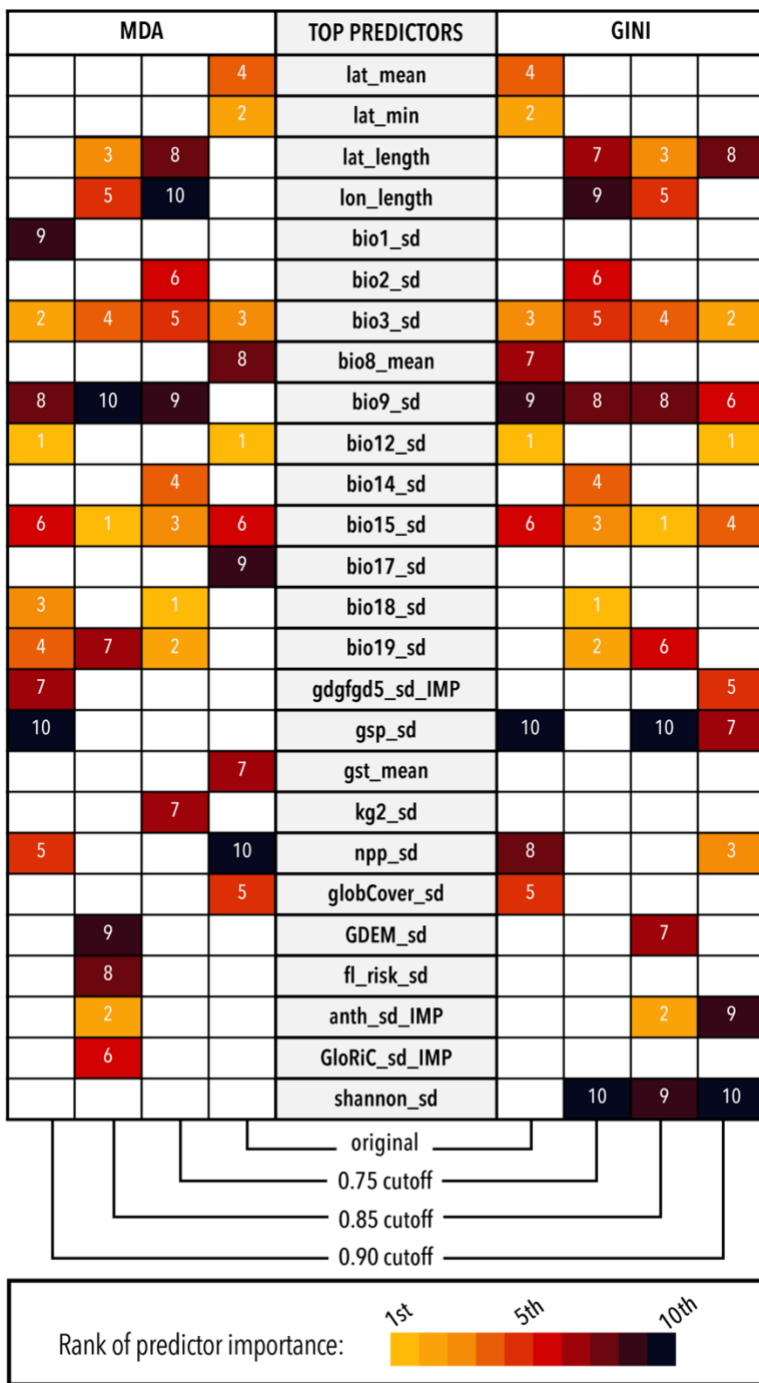

800  
 801 **Figure 4.** Variable importance for predictive models generated using the *majority rules* consensus. Variables ranked  
 802 among the top ten most important variables (based on MDA and Gini) from the predictive model generated at different  
 803 correlation cut-offs are included.

A

| MAJORITY RULES<br>(cutoff = 0.90) | Top Predictors | Median     |        | Kruskal-Wallis Test |           |
|-----------------------------------|----------------|------------|--------|---------------------|-----------|
|                                   |                | Not Hidden | Hidden | chi-squared         | p-value   |
|                                   | bio12_sd       | 22.3       | 246    | 22.288              | 2.35E-06  |
|                                   | bio3_sd        | 0.354      | 2.1    | 15.854              | 6.84E-05  |
|                                   | bio18_sd       | 10.2       | 53.9   | 10.943              | 0.0009397 |
|                                   | bio19_sd       | 14.7       | 63.8   | 13.49               | 0.0002398 |
|                                   | npp_sd         | 33.4       | 140    | 13.562              | 0.0002308 |

B

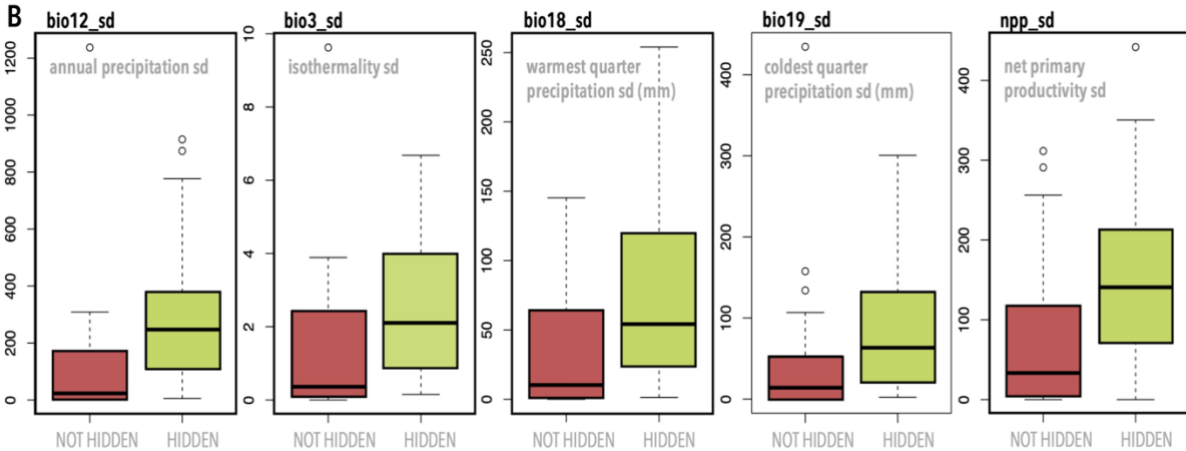

804

805 **Figure 5.** Difference in hidden vs not hidden trait values. A, Results of Kruskal-Wallis significance test on the top five  
 806 most important predictors of the best model (*majority rules* – correlation cutoff 0.90). B, Corresponding boxplots for  
 807 said predictors show a significant difference in the range of trait values between hidden and non-hidden genetic  
 808 lineages.

809

810

811
